# Supplementary material for: RAFT-photomediated PISA in dispersion: mechanism, optical properties and application in templated synthesis
Source: Royal Society of Chemistry journal article supplement (doi:10.1039/c9py00209j), 2019-01-01
Supplement: c9py00209j1.pdf [file c9py00209j1.pdf]

## Supplementary information

### RAFT-Photomediated PISA in Dispersion: Mechanism, Optical Properties and Application in Templated Synthesis

Vitalii Tkachenko, Camélia Matei Ghimbeu, Cyril Vaultot, Loïc Vidal, Julien Poly and Abraham Chemtob

- I. Nitrogen adsorption
- II. Calculation of colloidal data
- III. Additional tables
- IV. Additional figures
- V. References

#### I. Nitrogen adsorption

N<sub>2</sub> adsorption isotherm were obtained by using Micromeritics ASAP 2420. The samples were first outgassed at 573K during 12h and weighted to determine the real mass. After, the samples were outgassed a second time on the analysis port at 573 K during 2 h before analysis. The tubes were not backfilled with N<sub>2</sub> before analysis. The free volume measurements were realized after analysis in order to avoid the pollution and/or the not-reversible capture of He in the materials. The isotherms were deconvoluted with different models in order to extract the textural properties. In particular, we have used Brunauer-Emmet-Teller (BET) model<sup>1</sup> for the surface determination. The Rouquerol procedure<sup>2</sup> was used to avoid any subjectivity in evaluating the BET monolayer capacity. On the other hand, the porosity distributions were calculated by applying Density Functional Theory model (global calculation) and by Brunauer-Joyner<sup>3</sup> (mesoporous distribution).

#### II. Calculations of colloidal data

##### II.1 Number of particles ( $N_p$ )

$$N_p = \frac{6\tau}{\pi\rho_{PS}D_p^6} \quad (1)$$

Where

$\rho_{PS}$ : density of polystyrene = 1.047 [g cm<sup>3</sup>]

$D_p$ : diameter of particles determined by TEM images using ImageJ software [nm]

$\tau$ : mass concentration of copolymer (2) [g L<sup>-1</sup>]

##### II.2 Mass concentration of copolymer calculations ( $\tau$ ) :

$$\tau = \frac{Conv. \cdot m_{monomer} + m_{macro-CTA}}{\frac{m_{solvent}}{\rho_{solvent}} + \frac{m_{H_2O}}{\rho_{H_2O}}} \quad (2)$$

Where

*Conv.*: Conversion of styrene at current time []

$m_{monomer}$ : initial mass of monomer [g]

$m_{macro-CTA}$ : initial mass of macro-CTA [g]

$m_{solvent}$ : initial mass of solvent [g]

$\rho_{solvent}$ : volumetric mass density of solvent [g L<sup>-1</sup>]

$m_{H_2O}$ : initial mass of water [g]

$\rho_{H_2O}$ : volumetric mass of water [g L<sup>-1</sup>]

### II.3 Polydispersity index calculations (*PDI*)

$$PDI = \frac{D_w}{D_n} \quad (3)$$

Where

$D_w$ : weight-average diameter [nm]

$D_n$ : number-average diameter [nm]

Weight-average diameter calculations ( $D_w$ ):

$$D_w = \frac{\sum D_p^4}{\sum D_p^3} \quad (4)$$

Where

$D_p$ : diameter of particles determined by TEM [nm]

Number-average diameter calculations ( $D_n$ ):

$$D_n = \frac{\sum D_p}{n} \quad (5)$$

Where

$D_p$ : diameter of particles determined by TEM [nm]

$n$ : number of particles used in manual treating of TEM images with ImageJ software [-]

### II.4 Mean aggregation number calculations ( $N_{agg}$ )

$$N_{agg} = \frac{c(\text{macro-CTA}) \cdot N_a}{N_p} \quad (6)$$

Where

$c(\text{macro-CTA})$ : molar concentration of macro-CTA in reaction mixture [mol L<sup>-1</sup>]

$N_a$ : Avogadro constant =  $6.022 \cdot 10^{23}$  [mol<sup>-1</sup>]

$N_p$ : Number of particles per 1 liter of reaction mixture [L<sup>-1</sup>]

## II.5 Surface area stabilized by a copolymer chain calculation ( $S_{agg}$ ) :

$$S_{agg} = \frac{\pi \cdot D_p^2}{N_{agg}} \quad (7)$$

Where

$D_p$ : diameter of particles determined by TEM [nm]

$N_{agg}$  : mean aggregation number []

### III. Additional tables

**Table S1.** PHEA macro-CTAs with different chain lengths

| macro-CTA               | Time<br>h | Conv.<br>% | $M_n$<br>g/mol     | $M_w/M_n$ |
|-------------------------|-----------|------------|--------------------|-----------|
| PHEA <sub>25</sub> -TTC | 5         | 61         | $3.12 \cdot 10^3$  | 1.15      |
| PHEA <sub>52</sub> -TTC | 5         | 60         | $6.29 \cdot 10^3$  | 1.17      |
| PHEA <sub>85</sub> -TTC | 5         | 63         | $10.14 \cdot 10^3$ | 1.19      |

Time – time of irradiation.  $M_n$  – molecular weight determined by SEC in THF.  $M_w/M_n$  – dispersity determined by SEC in THF

**Table S2.** Textural and structural properties of PHEA<sub>25</sub>-PS<sub>118</sub>(**a**), PHEA<sub>25</sub>-PS<sub>160</sub>(**b**) and Pluronic F127(**c**) based carbon materials synthesized with molar ratio of phloroglucinol:glyoxylic acid:copolymer = 1:1:0.019

| Name                                  | $S_{BET}$<br>$m^2 g^{-1}$ | $V_t$<br>$cm^3 g^{-1}$ | $V_{micro}$<br>$cm^3 g^{-1}$ | $V_{meso}$<br>$cm^3 g^{-1}$ | $D_p$<br>nm | $D_{p(TEM)}$<br>nm |
|---------------------------------------|---------------------------|------------------------|------------------------------|-----------------------------|-------------|--------------------|
| PHEA <sub>25</sub> -PS <sub>118</sub> | 691                       | 1.30                   | 0.29                         | 1.01                        | ~ 22        | ~ 22               |
| PHEA <sub>25</sub> -PS <sub>160</sub> | 702                       | 1.57                   | 0.34                         | 1.23                        | ~22         | ~ 29               |
| Pluronic F127                         | 679                       | 0.83                   | 0.34                         | 0.49                        | 6.5         | ~ 7                |

$S_{BET}$  – total surface area determined by the BET method.  $V_t$ ,  $V_{meso}$  and  $V_{micro}$  – total pore volume, mesopore volume and micropore volume.  $D_p$  – mesopore diameter calculated by the BJH method from the isotherm adsorption branch.  $D_{p(TEM)}$  – mesopore diameter calculated by TEM images.

### IV. Additional figures

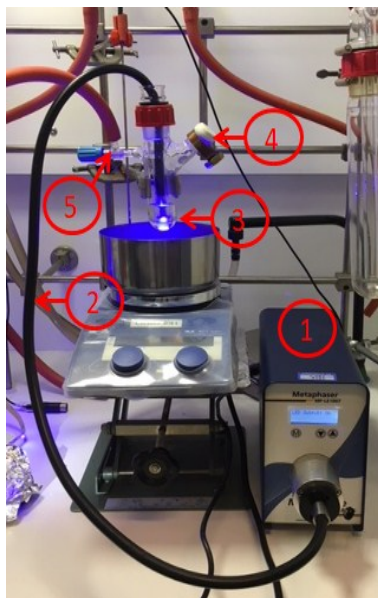

**Fig. S1** Immersion-type photoreactor used in this study. (1) LED light source (472 nm). (2) Waveguide. (3) Double-walled Schlenk tube. (4) Rubber septum. (5) Stopcock.

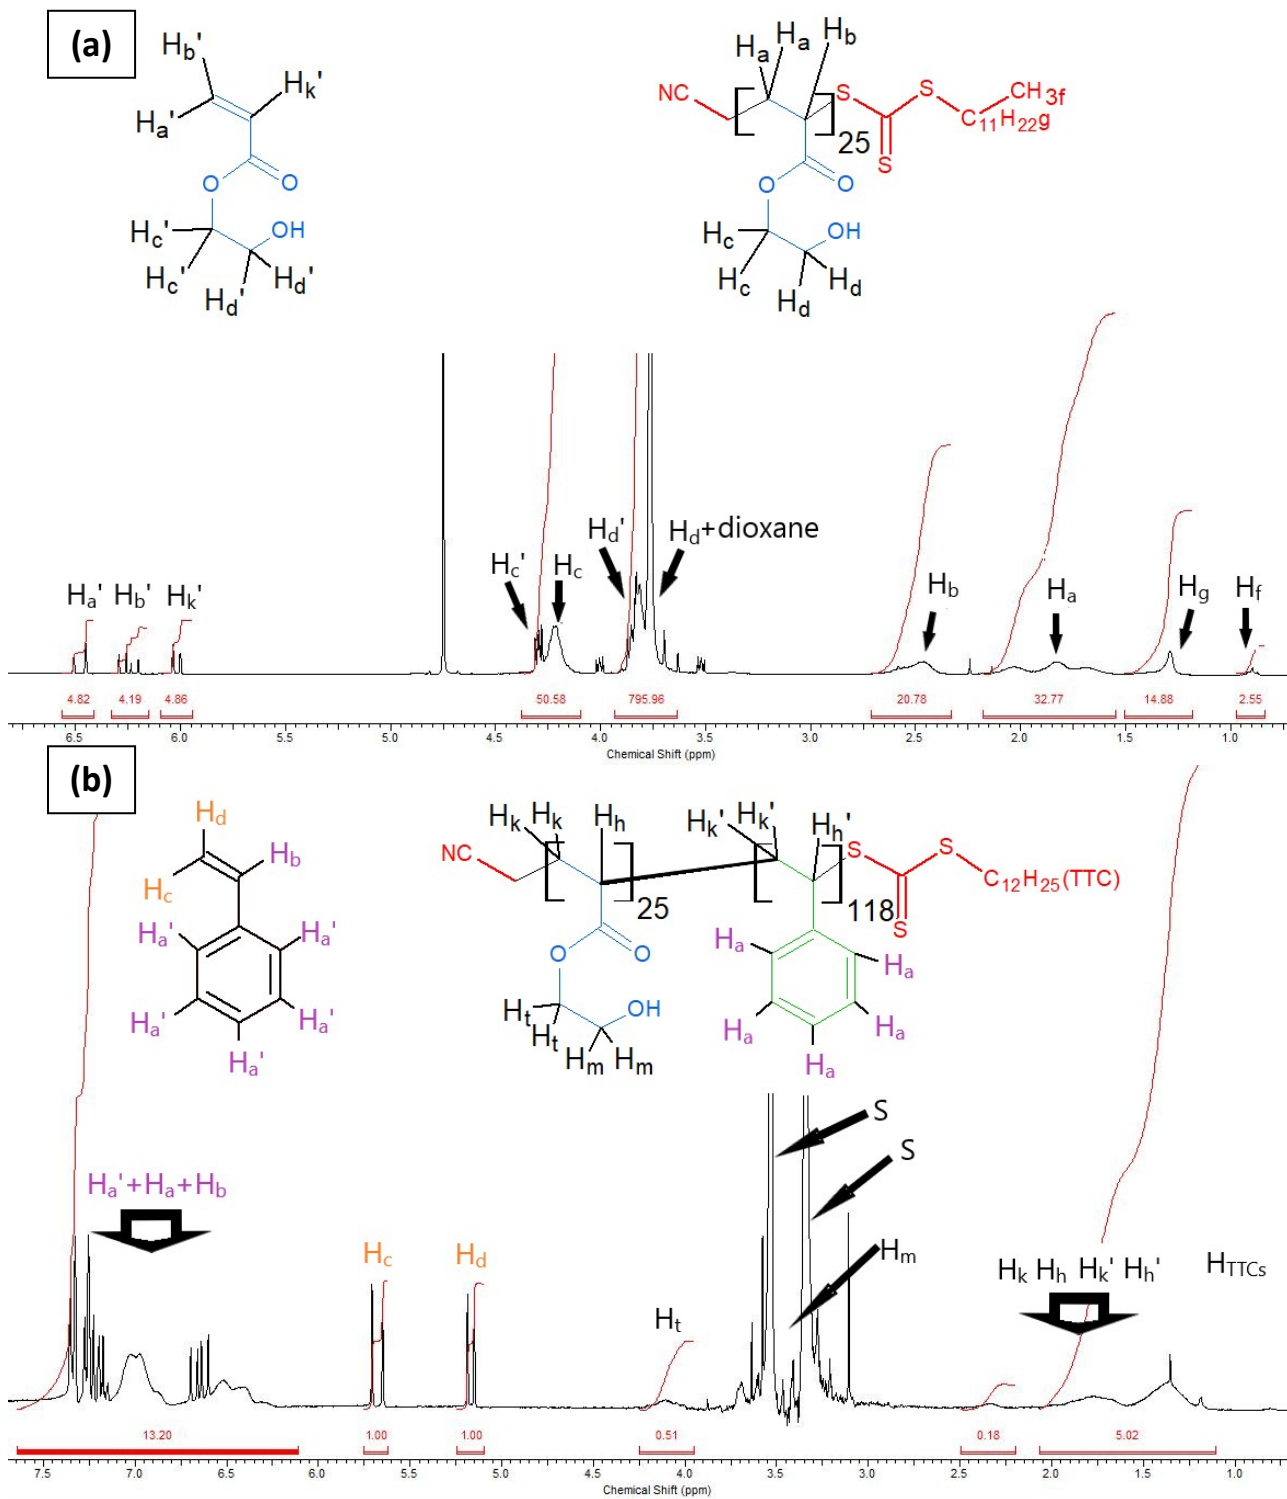

**Fig. S2 (a)** Example of  $^1\text{H}$  NMR spectrum of PHEA<sub>25</sub>-TTC. Conversion calculation :

$$1 - \frac{2 \cdot (I(H'_a) + I(H'_b) + I(H'_k))}{3 \cdot (I(H'_c) + I(H_c))} \cdot 100\% = 82\%$$

Conv. = . Experimental conditions: HEA : TTC =30 : 1;  $[\text{HEA}]_0 = 2.97 \text{ M}$  in dioxane, blue LED ( $547\text{mW cm}^{-2}$ ,  $35^\circ\text{C}$ , 21 hours). **(b)** Example of  $^1\text{H}$  NMR spectrum of PHEA<sub>25</sub>-PS<sub>118</sub>-TTC. Conversion calculation :

$$1 - \frac{5}{\left(\frac{2 \cdot (I(H'_a) + I(H_a) + I(H_b))}{I(H_c) + I(H_d)} - 1\right)} \cdot 100\% = 59\%$$

Conv. = . Experimental conditions: PHEA-TTC : St =1 : 200;  $[\text{PHEA-TTC}]_0 = 7.68 \text{ mM}$  in methanol/water mixture (8.18 g/0.43 g, 95/5 w/w %), blue LED ( $547\text{mW cm}^{-2}$ ,  $35^\circ\text{C}$ , 70 hours).

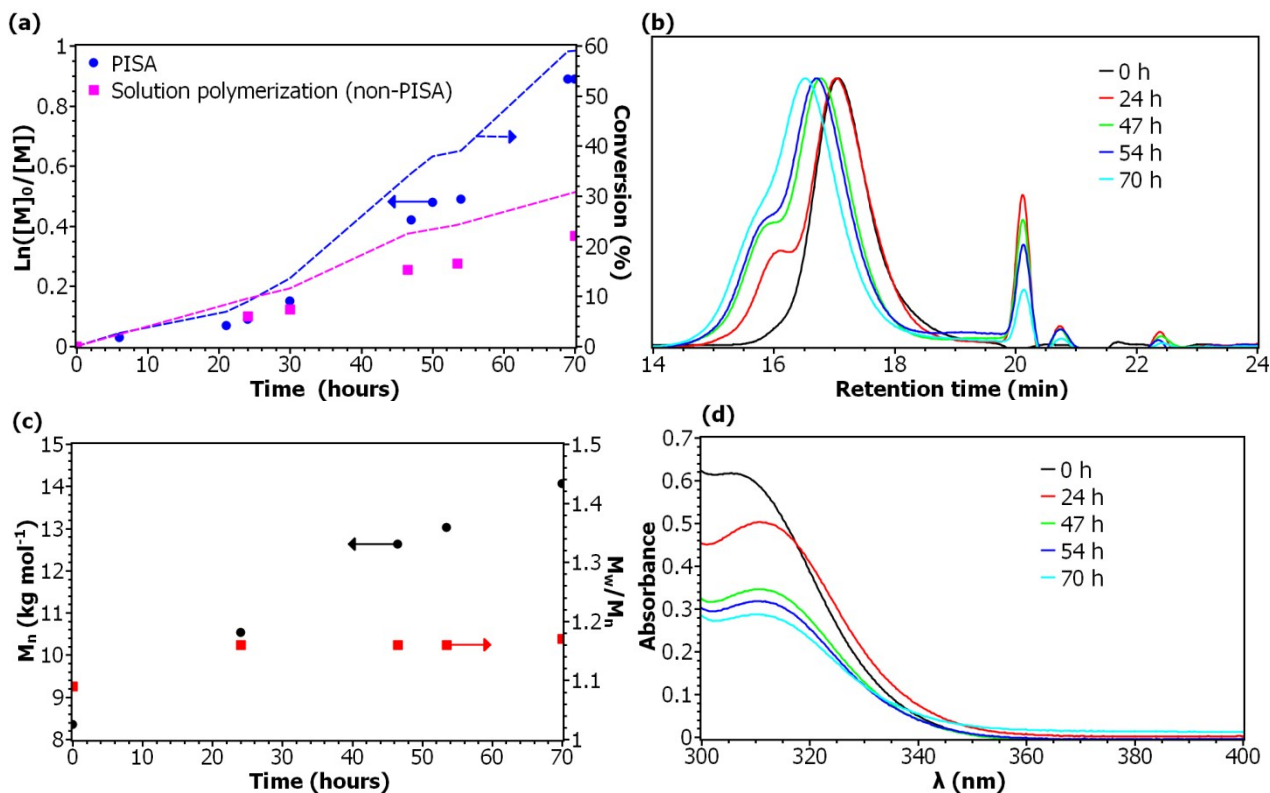

**Fig. S3** (a) Conversion versus reaction time for the syntheses of PHEA<sub>25</sub>-PS<sub>118</sub> (PISA in dispersion) and PHEA<sub>25</sub>-PS<sub>62</sub> (solution) copolymers. (b) SEC chromatograms (RI detector) of PHEA<sub>25</sub>-TTC and PHEA<sub>25</sub>-PS<sub>m</sub> diblock copolymers synthesized *via* RAFT photomediated polymerization in solution. (c) Evolution of  $M_n$  and polydispersity index with conversion. (d) UV-spectra of PHEA<sub>25</sub>-TTC during solution polymerization. Experimental conditions: PHEA-TTC:St = 1 : 200; [PHEA-TTC]<sub>0</sub> = 7.68 mM in dioxane (10.7 g), blue LED (547 mW cm<sup>-2</sup>, 35 °C).

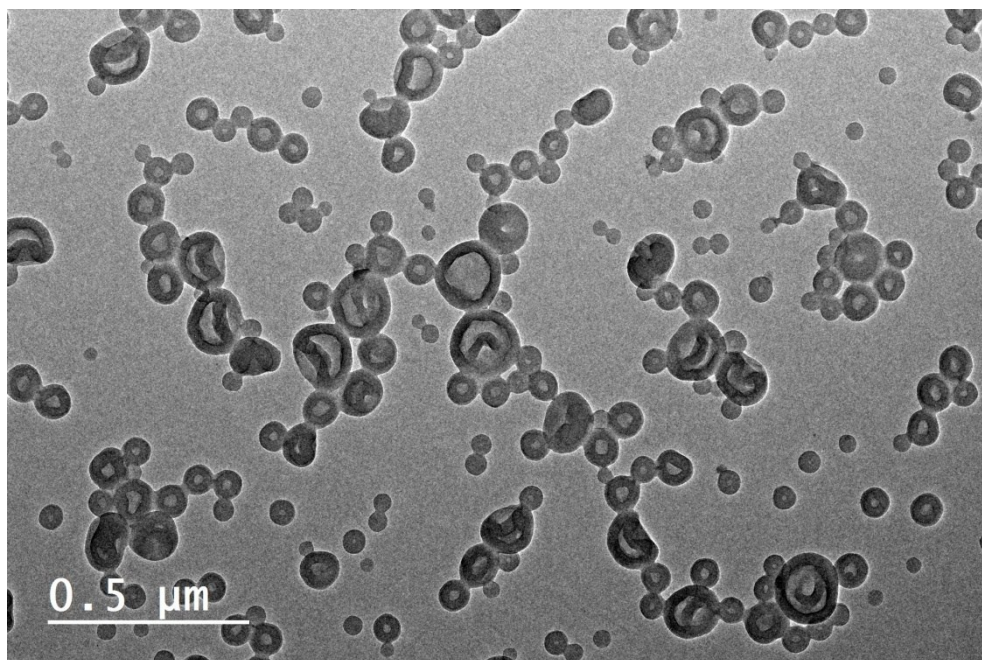

**Fig. S4** TEM image of vesicular nano-objects based on PHEA<sub>17</sub>-PS<sub>136</sub> copolymer synthesized *via* dispersion PISA of St.

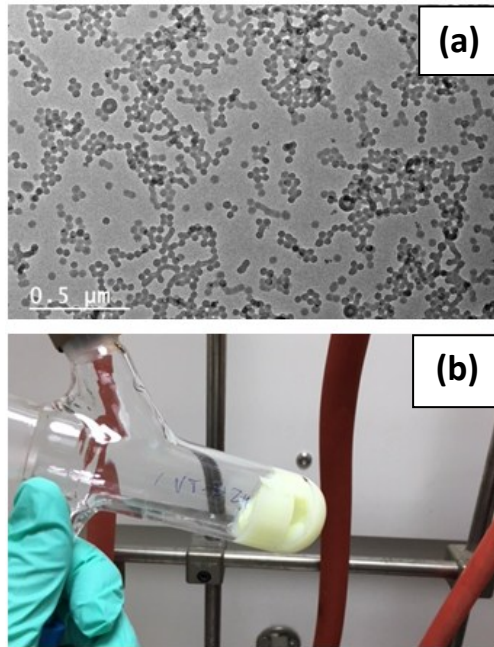

**Fig. S5** (a) TEM image of PHEA<sub>25</sub>-PS<sub>118</sub> latex after addition of a shot of divinylbenzene (DVB). (b) Gelation was observed within 24 h of irradiation. Experimental conditions: DVB (20 mg) was added in the reaction mixture of PHEA<sub>25</sub>-PS<sub>118</sub> (5 g).

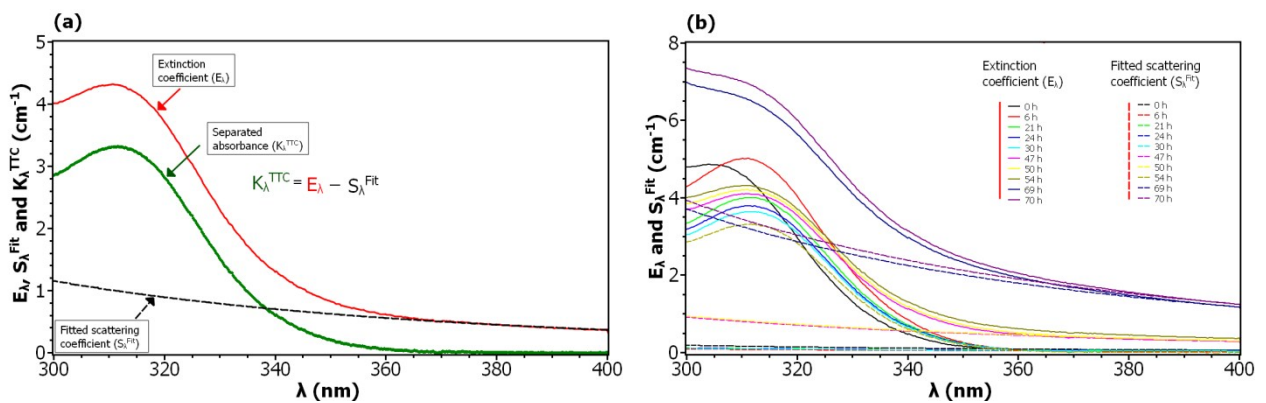

**Fig. S6** (a) Example of the fitting of scattering coefficient ( $S_{\lambda}^{Fit}$ ) for 54 h of irradiation. (b) Summary of the fitting of scattering coefficient ( $S_{\lambda}^{Fit}$ ).

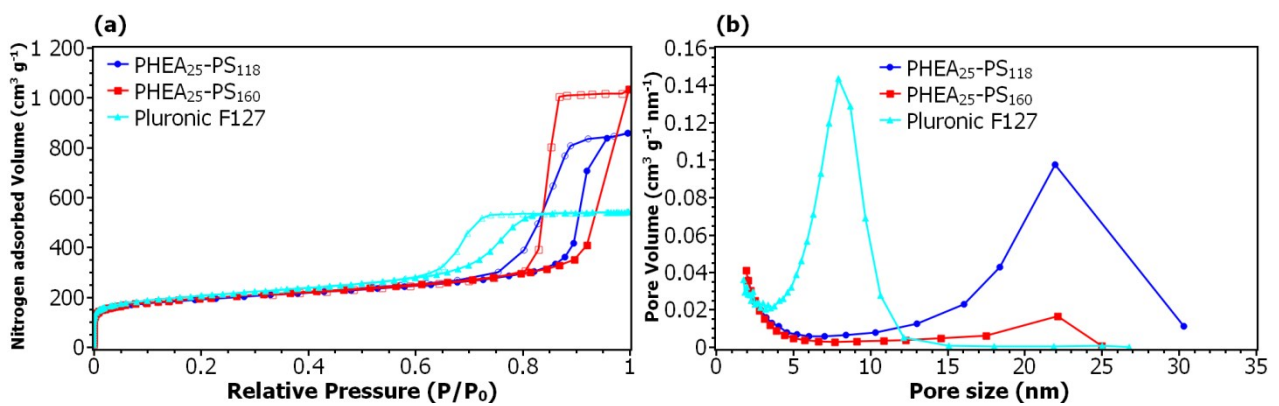

**Fig. S7 (a)** Nitrogen adsorption/desorption isotherms and **(b)** pore size distribution by the BJH method of PHEA<sub>25</sub>-PS<sub>118</sub>(blue), PHEA<sub>25</sub>-PS<sub>160</sub>(red) and Pluronic F127(cyan) based carbon materials synthesized with molar ratio of phloroglucinol:glyoxylic acid:copolymer = 1:1:0.019.

#### **V. References**

- 1 S. Brunauer, P.H. Emmett, E. Teller, *J Am. Chem. Soc.*, 1938, **60**, 309.
- 2 J. Rouquerol, P. Llewellyn, F. Rouquerol, *Stud. Surf. Sci. Catal.*, 2007, **160**, 49.
- 3 E.P. Barrett, L.G. Joyner, P.H. Halenda, *J Am. Chem. Soc.*, 1951, **73**, 373.
